# Supplementary material for: Role of Shiga Toxins in Cytotoxicity and Immunomodulatory Effects of Escherichia coli O157:H7 during Host-Bacterial Interactions in vitro
Source: MDPI journal article supplement (doi:10.3390/toxins12010048), 2020-01-14
Supplement: s1 [file s1]

## Supplementary Materials: Role of Shiga Toxins in Cytotoxicity and Immunomodulatory Effects of *Escherichia coli* O157:H7 during Host-Bacterial Interactions in vitro

Andrea Cecilia Bruballa, Carolina Maiumi Shiromizu, Alan Mauro Bernal, Gonzalo Ezequiel Pineda, Florencia Sabbione, Analia Silvina Trevani, Leticia Verónica Bentancor, María Victoria Ramos, Romina Jimena Fernández-Brando, Manuel Javier Muñoz and Marina Sandra Palermo \*

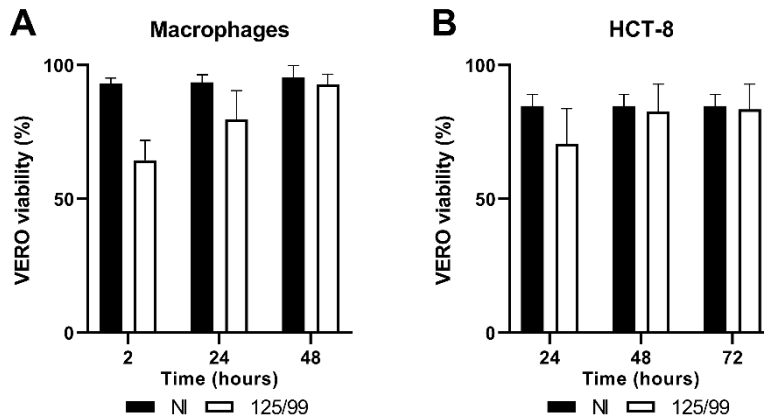

**Figure S1.** Stx2 activity in lysates from infected macrophages and HCT-8 cells. Lysates from macrophages (A) or HCT-8 cells (B) were obtained at the indicated times after infection with 125/99. Lysates of non-infected cells were used as controls (NI) and all values were normalized considering Vero cells cultured in medium 1:2 PBS without any lysates 100% viability. Data represent mean  $\pm$  SEM for biological replicates (n = 3).
